# Low-Level Laser Irradiation Stimulates Tenocyte Migration with Up-Regulation of Dynamin II Expression

Wen-Chung Tsai<sup>1,2</sup>, Chih-Chin Hsu<sup>1,2</sup>, Jong-Hwei S. Pang<sup>3\*</sup>, Miao-Sui Lin<sup>1,2</sup>, Ying-Hsun Chen<sup>1</sup>, Fang-Chen Liang<sup>1</sup>

**1** Department of Physical Medicine and Rehabilitation, Chang Gung Memorial Hospital, Taoyuan County, Taiwan, **2** College of Medicine, Chang Gung University, Taoyuan County, Taiwan, **3** Graduate Institute of Clinical Medical Sciences, Chang Gung University, Taoyuan County, Taiwan

## Abstract

Low-level laser therapy (LLLT) is commonly used to treat sports-related tendinopathy or tendon injury. Tendon healing requires tenocyte migration to the repair site, followed by proliferation and synthesis of the extracellular matrix. This study was designed to determine the effect of laser on tenocyte migration. Furthermore, the correlation between this effect and expression of dynamin 2, a positive regulator of cell motility, was also investigated. Tenocytes intrinsic to rat Achilles tendon were treated with low-level laser (660 nm with energy density at 1.0, 1.5, and 2.0 J/cm<sup>2</sup>). Tenocyte migration was evaluated by an *in vitro* wound healing model and by transwell filter migration assay. The messenger RNA (mRNA) and protein expressions of dynamin 2 were determined by reverse transcription/real-time polymerase chain reaction (real-time PCR) and Western blot analysis respectively. Immunofluorescence staining was used to evaluate the dynamin 2 expression in tenocytes. Tenocytes with or without laser irradiation was treated with dynasore, a dynamin competitor and then underwent transwell filter migration assay. *In vitro* wound model revealed that more tenocytes with laser irradiation migrated across the wound border to the cell-free zone. Transwell filter migration assay confirmed that tenocyte migration was enhanced dose-dependently by laser. Real-time PCR and Western-blot analysis demonstrated that mRNA and protein expressions of dynamin 2 were up-regulated by laser irradiation dose-dependently. Confocal microscopy showed that laser enhanced the expression of dynamin 2 in cytoplasm of tenocytes. The stimulation effect of laser on tenocytes migration was suppressed by dynasore. In conclusion, low-level laser irradiation stimulates tenocyte migration in a process that is mediated by up-regulation of dynamin 2, which can be suppressed by dynasore.

**Citation:** Tsai W-C, Hsu C-C, Pang J-HS, Lin M-S, Chen Y-H, et al. (2012) Low-Level Laser Irradiation Stimulates Tenocyte Migration with Up-Regulation of Dynamin II Expression. PLoS ONE 7(5): e38235. doi:10.1371/journal.pone.0038235

**Editor:** Michael Hamblin, Massachusetts General Hospital - MMS, United States of America

**Received:** December 16, 2011; **Accepted:** May 1, 2012; **Published:** May 30, 2012

**Copyright:** © 2012 Tsai et al. This is an open-access article distributed under the terms of the Creative Commons Attribution License, which permits unrestricted use, distribution, and reproduction in any medium, provided the original author and source are credited.

**Funding:** The study received financial support for National Science Council, Taiwan. The funders had no role in study design, data collection and analysis, decision to publish or preparation of the manuscript.

**Competing Interests:** The authors have declared that no competing interests exist.

\* E-mail: jonghwei@mail.cgu.edu.tw

## Introduction

Low-level laser therapy (LLLT) has been used to treat musculoskeletal pain for nearly 3 decades [1]. Clinical applications show its potential of effectiveness in treating soft tissue musculoskeletal injuries, chronic pain, and wound healing [2]. Many studies have revealed the effectiveness of LLLT to treat patients with tendinopathy [3–6]. Although the wide spread clinical usage of this physical modality suggests its efficacy, scientific evidence of the effects and underlying molecular mechanisms for tendinopathy treatment remained limited.

*In-vivo* studies have revealed that LLLT could enhance healing in Achilles tendon by improving collagen fibers organization, preventing oxidative stress as well as reducing fibrosis [7–9]. The exact mechanism is still being explored and debated but it is likely that the mechanism is photochemical rather than thermal [10–12]. The primary biophysiological effects include regulation of adenosine triphosphate (ATP) [13–16], reactive oxygen species (ROS) [17–21], and nitric oxide (NO) [22–24]. In the regenerative phase of tendon injury, the tenocytes migrate into the repaired site, proliferate actively, and are responsible for the abundant deposition of extracellular matrix (ECM) in the tissue. It was demonstrated that laser irradiation could promote porcine

tenocyte proliferation and up-regulation of type I collagen and decorin [25]. Among physical agents, therapeutic ultrasound and electric stimulation have been demonstrated to enhance tenocytes and ligament fibroblast migration respectively [26,27]. However, to our knowledge, there is no study exploring the effect and underlying molecular mechanism of laser irradiation on tenocyte migration.

Cell migration involves the rearrangement of specific cellular structures, such as the Golgi complex [28], the centrosome [29] and focal adhesions [30]. Dynamins are large molecular weight GTPases~100 kDa in size and reside at these diverse cellular locations. Along with its well-documented role in endocytosis, dynamin plays a significant role in cell migration [31]. Dynamin 1 is restricted to neuronal cells; dynamin 2 is ubiquitously expressed; and dynamin 3 may be limited to brain, lung and testis. Expression of mutant dynamin 2 or knocking down dynamin 2 by RNAi reduces lamellipodial extension [32]. Besides, injections of anti-dynamin antibodies into amoeba result in a loss of directional migration and a reduction in the rate of uroidal translocation [33].

The purpose of this study is to investigate the effect of laser on tenocyte migration and its correlation with the mRNA and protein expressions of dynamin 2.

## Methods

All the procedures were approved by Chang Gung University Institutional Animal Care and Use Committee before the experiments.

### Primary Culture of Rat Achilles Tenocytes

The Achilles tendons from 16 Sprague-Dawley rats (weighing 200 to 250 gm) were excised. The excised tendon was soaked in povidone-iodine for 3 minutes and washed twice in phosphate-buffered saline (PBS). Each tendon was then cut into small pieces of approximately 1.5–2.0 mm<sup>3</sup> (6 pieces in total) and these pieces were individually placed in six-well culture plates. After 5 minutes of air-drying for better adherence, 0.5 ml of Dulbecco's modified Eagle's medium (DMEM)(HyClone, Logan, Utah, USA), with 10% fetal bovine serum (FBS)(Cansera, Rexdale, Ontario, Canada), 100 U/ml penicillin, and 100 µg/ml streptomycin was added to each well. The explants were then incubated at 37°C in a humidified atmosphere of 5% CO<sub>2</sub>/95% air. After migrating out from the explants, the cells started to grow rapidly and the confluence culture was subcultured by trypsin digestion at a 1:3 dilution ratio. Tendon cells between passages 2 and 4, with proper growth rate and normal fibroblast-shape, were used in the following experiments.

### Laser Irradiation Procedure

Laser irradiation was carried out with 660 nm laser (Konftec, Megalas-AM-800, New Taipei City, Taiwan) in continuous mode with output power of 50 mW and unit energy density of 0.0032 J/sec-cm<sup>2</sup>. The power of irradiation was uniformly checked with a power meter before and after treatment. The laser beam irradiated the culture plate from above with a distance of 30 cm and covered the area up to 314 cm<sup>2</sup>. The laser beam was emitted perpendicularly and evenly to the culture plates for three groups of wells for periods of 5.2, 7.8, and 10.4 min, respectively. The corresponding energy densities were 1.0, 1.5, and 2.0 J/cm<sup>2</sup>. The irradiation was done on a clean bench through the medium culture at room temperature. The control groups were not subjected to laser irradiation but were removed from the incubator for the same time period as laser treated plates. The cell migration, mRNA expression and protein expression were assessed 24 h after laser irradiation.

### In vitro Wound Healing

Tenocytes were grown to confluence on glass coverslips in DMEM with 10% FBS. The confluent cell layer was scraped with a sterile pipette tip to consistently produce a circular cell free zone (1 cm in diameter) on the coverslips. The wound cultures were then incubated at 37°C for 24 hours and the in vitro wound healing was observed under microscope. The control groups were tenocytes without laser treatment, whereas the experimental groups were treated with 2.0 J/cm<sup>2</sup> laser. During the 24 h incubation in growth medium at 37°C, tenocytes began outgrowth and migrated in to the cell free zone which was considered as the process of in vitro healing. The in vitro wound healing was photographed at 24 h after laser treatment.

### Transwell Filter Migration Assay

Transwell filters (Costar, Cambridge, MA, USA) with 8.0 µm pores were used for the migration assay. Tenocytes with and without laser treatment at various doses (controls *versus* cultures treated with 1.0, 1.5, and 2.0 J/cm<sup>2</sup> laser) were seeded at a density of 1.2 × 10<sup>5</sup> cells per inner chamber of filter. The inner chamber was filled with 250 µl serum-free DMEM and the outer chamber

was filled with 600 µl DMEM with 10% FBS. Cells were allowed to migrate for 3 h at 37°C in an atmosphere of 95% air/5% CO<sub>2</sub>. The cells were stained with Liu's stain and then washed twice in PBS. Cells on the upper surface of the filter were removed using a cotton swab. The cells on the lower surface of the filter was counted under four random high-power microscopic fields (HPF)(100 ×)(1.37 × 10<sup>-4</sup> cm<sup>2</sup>) per filter and the mean number of migrating cells was calculated for each concentration.

### Reverse Transcription/Real-time Polymerase Chain Reaction (Real-time PCR)

Total RNA was extracted from tendon cells using solution D (1 ml solution D/10<sup>7</sup> cells). Subsequently, total RNA was extracted with phenol and chloroform:isoamyl alcohol (49:1) to remove proteins and genomic DNAs. Complementary (c)DNA was synthesized using 1 mg total RNA in a 20 ml volume RT reaction mix containing 0.5 mg of random primers, 0.8 mM dNTP, 0.1 M DTT and 1 L first strand buffer.). Quantitative real-time PCR was performed using an SYBR Green and MxPro-Mx3000P QPCR machine (Stratagene). Aliquots (20 ng) of cDNA were used for each quantitative PCR, and each reaction was run in triplicate. The following primers were used. GAPDH: 5'-TTCATTGACCTCAACTACAT-3' (forward) and 5'-GAGGGGCCATCCACAGTCTT-3' (backward). Dynamin 2: 5'-AGAACGGCAAGTGGAAAC-3' (forward) and 5'-AGCATAGGCAGCAGGTCA-3' (backward). Relative gene expressions between experimental groups were determined using MxPro software (Stratagene) and GAPDH was used as an internal control. All real-time PCRs were performed in triplicate, and changes in gene expressions were presented as multiples of increases relative to the untreated controls.

### Western Blot Analysis

Cell extracts were prepared in lysis buffer containing Tris-HCl (pH 7.5), 150 mM NaCl, 1 mM EDTA, 2 mM DTT, 2 mM PMSF and 1% Triton X-100 followed by sonication method. Protein concentration of the cell extracts were determined by Bradford assay (Bio-Rad Laboratories, CA, USA). Samples with identical protein quantities were then separated by 10% sodium dodecyl sulfate polyacrylamide gel electrophoresis, and transferred onto a PVDF membrane. The membrane was incubated at room temperature in blocking solution (1% BSA, 1% goat serum in PBS) for 1 h, followed by 2-h incubation in blocking solution containing an appropriate dilution of primary antibody, eg. anti-tubulin, anti-dynamin 2 (NeoMarks, Fremont, CA, USA). After washing, the membrane was incubated in PBS containing goat anti-mouse IgG conjugated with horseradish peroxidase (Sigma, St. Louis, MO, USA) for 1 h. The membranes were washed and the positive signals developed with enhanced chemiluminescence reagent (Amershan Pharmacia Biotech, Little Chalfont Buckinghamshire, UK).

### Immunofluorescence Staining

Subconfluent tenocytes grown on glass coverslips placed on the bottom of plastic dishes containing growth medium were then treated without or with laser at dosage of 2.0 J/cm<sup>2</sup>. Twenty-four hours after incubation at 37°C in an atmosphere of 95% air/5% CO<sub>2</sub>, the cells were fixed in 4% paraformaldehyde in PBS (pH 7.5) for 15 min at room temperature. The coverslips were first immersed for 30 min in blocking solution that contained 1% bovine serum albumin (BSA) and 1% goat serum in PBS. After three washings in PBS, the cells were incubated for 1 h with mouse monoclonal antibodies against dynamin 2 (NeoMarks, Fremont,

CA, USA), followed by incubation with FITC (fluorescein isothiocyanate)-conjugated secondary antibody for 1 h. Finally, DNA was counterstained with propidium iodide (PI) and observed under confocal microscopy.

### Dynasore Treatment

Dynasore, a known dynamin inhibitor, was added at 3  $\mu\text{g}/\text{ml}$  to tenocytes without or with 2.0  $\text{J}/\text{cm}^2$  laser treatment. After 24 h of incubation, transwell filter migration assay was performed to evaluate the effect of dynasore treatment alone as well as the combined effect of dynasore and laser treatment on tenocytes migration.

### Statistical Analysis

All data was expressed as mean  $\pm$  SEM. Comparisons between the results of tenocyte migration and spreading assays of the laser-treated and control cells was performed using Kruskal-Wallis test. A Mann-Whitney test was used to identify where the difference occurred. The level of statistical significance is set at a  $P$  value of 0.05.

### Results

The *in vitro* wound healing model revealed that more tenocytes in the laser-treated groups have migrated cross the wound border and entered the cell-free zone. However, only few control tenocytes were observed near the wound border (Figure 1). This result indicated that laser irradiation could enhance the *in vitro* wound healing.

The results of transwell filter migration assay demonstrated that laser significantly enhanced the tenocyte migration in a dose-dependent manner (Figure 2). The relative percentage of laser-treated tenocytes that migrated through the filters to the control tenocytes were  $118.8 \pm 4.6\%$ ,  $133.7 \pm 9.0\%$ , and  $156.5 \pm 11.1\%$  for tenocytes treated with 1.0  $\text{J}/\text{cm}^2$ , 1.5  $\text{J}/\text{cm}^2$  and 2.0  $\text{J}/\text{cm}^2$  laser respectively ( $p = 0.006$ ). There are statistically significant differences of cell migration between the control and tenocytes treated with 0.1  $\text{J}/\text{cm}^2$  laser ( $p = 0.014$ ), tenocytes treated with 1.0  $\text{J}/\text{cm}^2$  and 1.5  $\text{J}/\text{cm}^2$ , ( $p = 0.043$ ), as well as tenocytes treated with 1.5  $\text{J}/\text{cm}^2$  and 2.0  $\text{J}/\text{cm}^2$  ( $p = 0.021$ ).

The result of real-time PCR demonstrated that the mRNA expression of dynamin 2 in tenocytes was up-regulated by laser dose-dependently ( $1.02 \pm 0.02$ ,  $1.14 \pm 0.02$ ,  $1.35 \pm 0.01$  relative folds for tenocytes treated with 1.0  $\text{J}/\text{cm}^2$ , 1.5  $\text{J}/\text{cm}^2$  and 2.0  $\text{J}/\text{cm}^2$  laser respectively,  $p = 0.029$ ) (Figure 3). There are statistically significant differences of mRNA expression between tenocytes treated with 1.0  $\text{J}/\text{cm}^2$  and 1.5  $\text{J}/\text{cm}^2$  ( $p \leq 0.005$ ) as well as tenocytes treated with 1.5  $\text{J}/\text{cm}^2$  and 2.0  $\text{J}/\text{cm}^2$  ( $p \leq 0.005$ ).

Protein expression of dynamin 2 was also dose-dependently up-regulated by laser treatment, which was compatible with the results of real-time PCR (Figure 4A). The cellular protein expression of dynamin 2 was further examined by immunostaining of dynamin 2 and observed under fluorescent confocal microscopic. As revealed by Figure 4B, the cellular expression of dynamin 2 in control tenocytes was barely detected (i.e., fluorescent-green staining). However, in laser-treated tenocytes, the dynamin 2 expression was markedly increased in the cytoplasm. The cellular distribution of dynamin 2 in tenocytes was similar to the pattern reported for cells with high migratory potential in previous study. The significantly up-regulated expression of dynamin 2 was correlated well with the increase of numerous large lamellipodia protrusion [34]. These findings were compatible with the results of Western-blot analysis which confirmed that the protein expression of dynamin 2 in tenocytes could be significantly up-regulated after laser treatment.

To further investigate the role of dynamin 2 in the laser-induced migration of tenocytes, we pre-treated the cells with dynasore and study its effect on cell migration. Dynasore, a non-competitive inhibitor of dynamin GTPase activity, locks dynamin in a GTP-bound state likely through an association with the GTPase domain. The results of transwell filter migration assay revealed that the migration of tenocytes without laser treatment was only mildly suppressed ( $93.7 \pm 11.8\%$ ) by dynasore (Figure 5). But it was not statistically significant. In contrast, the stimulation of tenocytes migration by 2.0  $\text{J}/\text{cm}^2$  laser ( $140.0 \pm 10.9\%$ ) was significantly suppressed by dynasore treatment ( $93.6 \pm 2.7\%$ ) ( $p = 0.008$ ). The inhibition of dynamin 2 activity by dynasore could decrease the laser-induced tenocyte migration, which indicates the critical role of dynamin 2 in this migratory process.

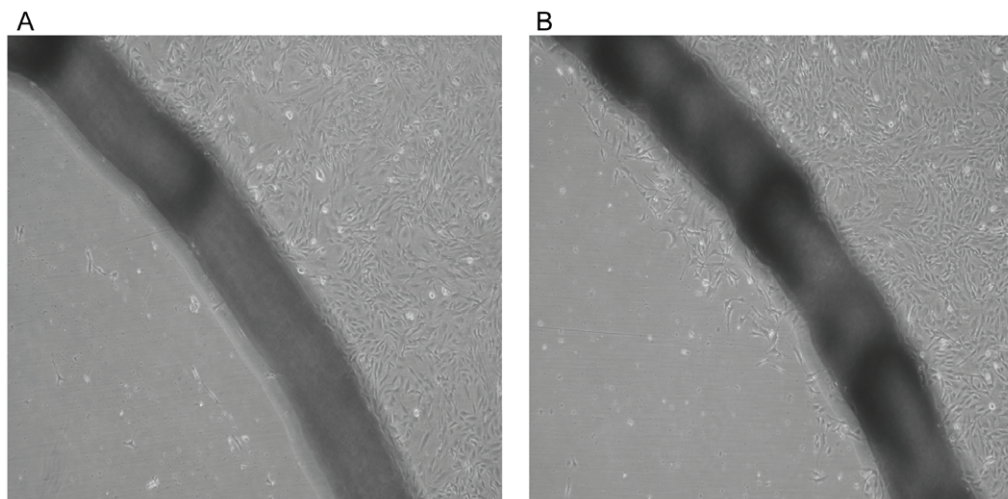

**Figure 1.** *In vitro* wound healing model revealed that few control cells (without laser treatment) migrated cross the wound border to enter the cell-free zone (A). Laser-treated group (B) revealed that more tenocytes migrated cross the wound border to enter the cell-free zone (200X).

doi:10.1371/journal.pone.0038235.g001

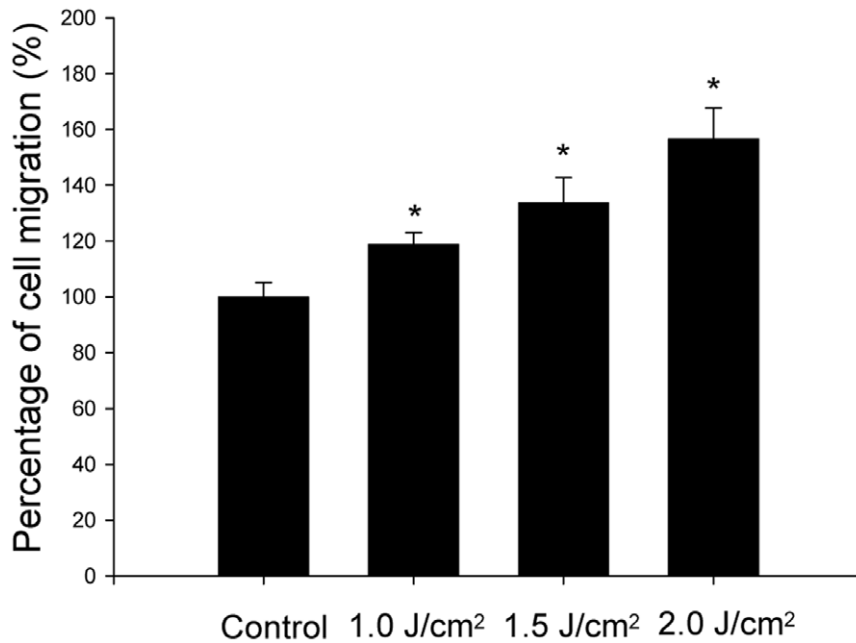

**Figure 2. Transwell filter migration assay revealed that laser stimulated tenocytes migration *in vitro* (\*indicates  $p < 0.05$  between laser-treated and control tenocytes).**

doi:10.1371/journal.pone.0038235.g002

## Discussion

Tendon structure consists mainly of dense collagen arranged in a linear fashion and the basic cellular component, i.e. tenocytes (tendon cells; fibroblasts). Tenocytes, appearing as a stellate cell in cross-sections and in rows in longitudinal section, are the source of collagen production, protein mediators of repair, and matrix proteoglycans [35,36]. For an injured tendon, the healing process can be divided into three overlapping phases: (1)

inflammation; (2) regeneration; and (3) remodeling and maturation [36]. In the regenerative phase of tendon injury, tenocytes migrate into the repaired site, proliferate actively, and are responsible for the abundant deposition of ECM in the tissue. Tenocyte migration is fundamental to the healing process of an injured tendon. It was demonstrated that laser could enhance fibroblasts attachment to root surfaces, which implied that laser might have a positive effect on fibroblast motility [37]. It was also demonstrated that laser phototherapy can stimulate migration

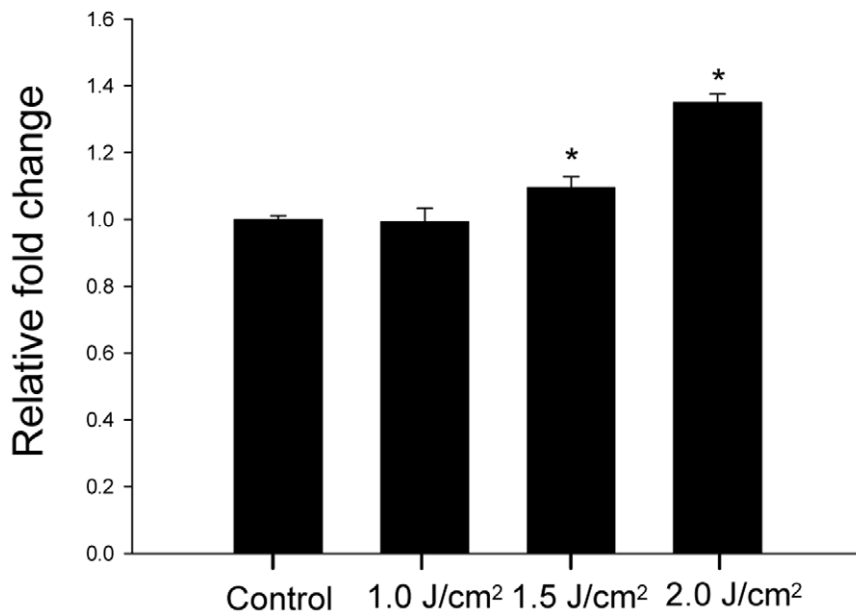

**Figure 3. Real-time PCR revealed that the expression of dynamin 2 was up-regulated by laser (\*indicates  $p < 0.05$  between laser-treated and control tenocytes).**

doi:10.1371/journal.pone.0038235.g003

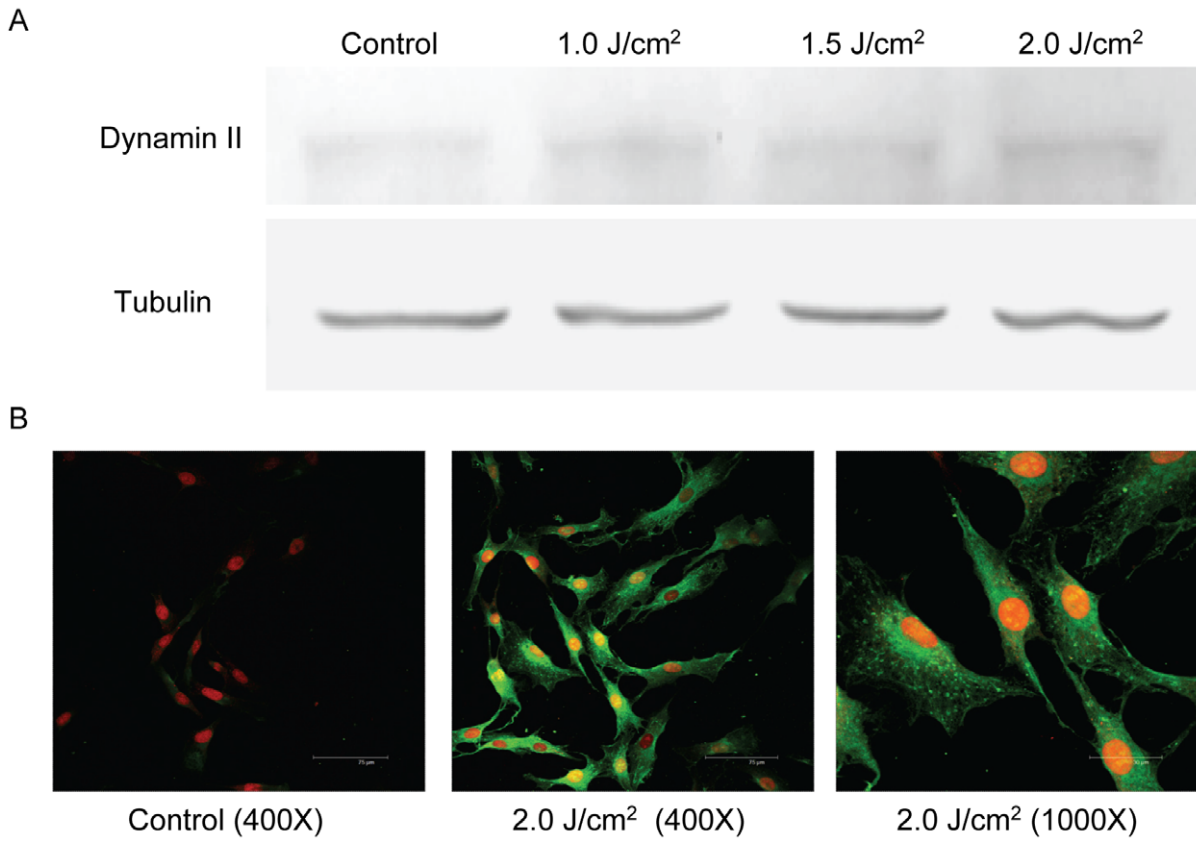

**Figure 4. The expression of dynamin 2 in tenocytes.** Western blot analysis revealed that dynamin 2 was up-regulated by laser treatment. The tubulin (as internal control) and dynamin 2 were identified at 57 kDa and 100 kDa respectively. (A) Immunofluorescence staining revealed the significantly increased dynamin 2 expression in cytoplasm as indicated by fluorescent-green stain. doi:10.1371/journal.pone.0038235.g004

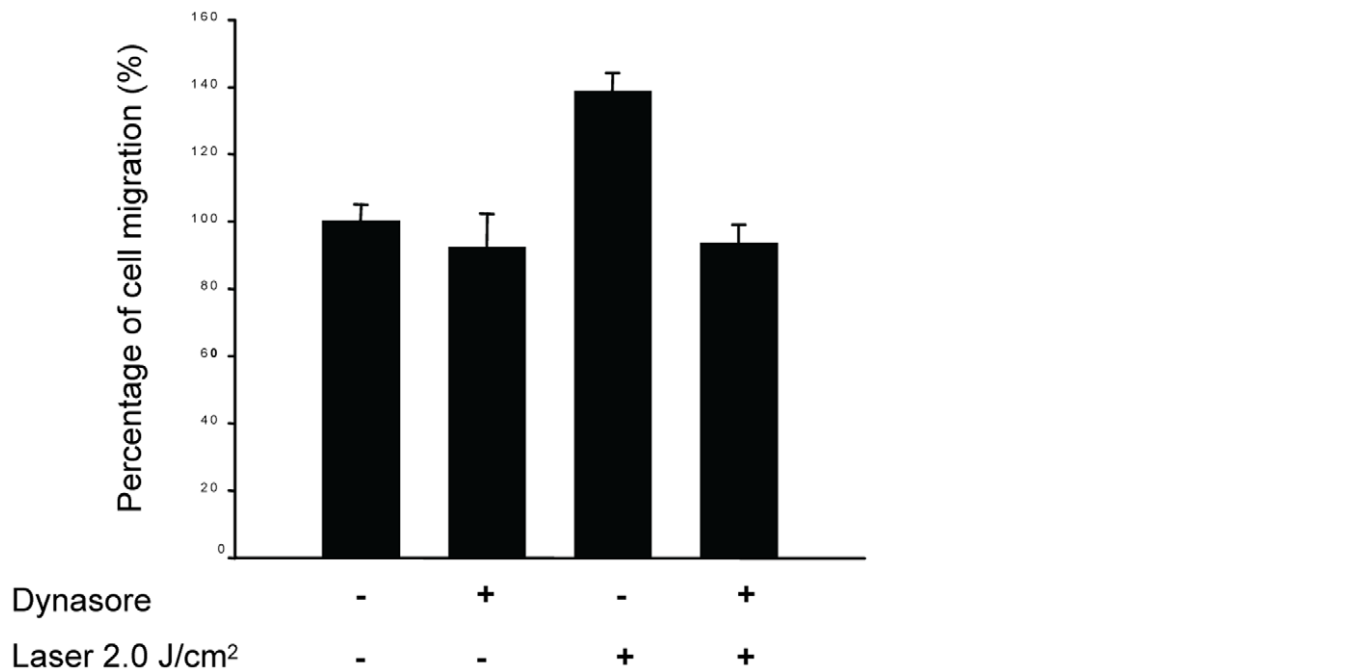

**Figure 5. Dynasore inhibited the stimulation of tenocyte migration by low-level laser irradiation.** Laser can not stimulate migration of tenocytes pre-treated with dynasore (“+”: with dynasore or laser treatment; “-”: without dynasore or laser treatment). doi:10.1371/journal.pone.0038235.g005

and fiber sprouting of neuronal cells aggregates [38,39]. To our knowledge, this study was the first to demonstrate that laser, in a dose-dependent manner, can enhance tenocytes migration, which is associated with up-regulations of mRNA and protein expressions of dynamin 2.

Cell migration is led by pseudopodia such as lamellipodia or filopodia, plasma membrane protrusive structure enriched with F-actin. The large GTPase dynamin, long known for its role in endocytosis, has most recently been implicated as a facilitator of cell migration and invasion [31,40]. Recent reports link dynamin to the cycle of membrane expansion and retraction essential for cell motility. It indicates that dynamin might promote efficient cell migration by participating in lamellipodial extension. Its role in actin polymerization, membrane deformation and vesiculation, and focal adhesion dynamics are all important for this process.

It is reported that that dynamin 2 interacts and co-localizes with focal adhesion kinase (FAK) at focal adhesions [41]. It was reported that cells expressing the dynamin 2 mutant have reduced rates of migration into a wound and exhibit a characteristic drag of the uropod, which suggests an inappropriate persistence of focal adhesion attachment.

Dynasore, a membrane permeable small molecule, decreases endocytosis, cell spreading, and cell attachment and is a non-competitive inhibitor of dynamin [42]. It has been widely used to investigate dynamin-dependent endocytosis [43] Dynasore strongly destabilizes F-actin both *in vitro* and *in vivo*. Application of dynasore led to reduction of lamellipodia formation and inhibition of cellular invasion by destabilizing actin filaments [44]. It has been demonstrated that dynasore led to dissociation of dynamin 2 from F-actin, and reduction of dynamin 2-positive dots on F-actin [44]. Besides, dynasore also interfered the interaction of dynamin 2 and cortactin [44]. It was demonstrated that dynasore provides a means to rapidly block the formation of clathrin-coated vesicles, with the initial effects being observable within seconds and a more complete halt in coated-pit dynamics occurring within minutes [42]. The results of this study revealed that dynasore could inhibit laser stimulation of tenocyte migration. These findings verify the role of dynamin 2 in mediating laser stimulation of tenocyte migration.

## References

- Goldman JA (1981) Investigative studies of laser technology in rheumatology and immunology In: Goldman L, ed. The biomedical laser: technology and clinical applications. New York: Springer-Verlag. 293 p.
- Basford JR, Baxter GD (2010) Therapeutic physical agents. In: Frontera WR, ed. DeLisa's physical medicine and rehabilitation. Fifth ed. Philadelphia: Lippincott Williams & Wilkins. pp 1706–1707.
- Tumilty S, Munn J, McDonough S, Hurley DA, Basford JR, et al. (2010) Low level laser treatment of tendinopathy: a systematic review with meta-analysis. *Photomedicine and Laser Surgery* 28: 3–16.
- Bjorndal JM, Lopes-Martins RA, Joensen J, Coupe C, Ljunggren AE, et al. (2008) A systematic review with procedural assessments and meta-analysis of low level laser therapy in lateral elbow tendinopathy (tennis elbow). *BMC Musculoskeletal Disorders* 9: 75.
- Stergioula A, Stergioula M, Aarskog R, Lopes-Martins RAB, Bjorndal JM (2008) Effects of low-level laser therapy and eccentric exercises in the treatment of recreational athletes with chronic achilles tendinopathy. *American Journal of Sports Medicine* 36: 881–887.
- Saunders L (2003) Laser versus Ultrasound in the Treatment of Supraspinatus Tendinosis: Randomised controlled trial. *Physiotherapy* 89: 365–373.
- Casalechi HL, Nicolau RA, Casalechi VL, Silveira L, Jr., De Paula AMB, et al. (2009) The effects of low-level light emitting diode on the repair process of Achilles tendon therapy in rats. *Lasers in Medical Science* 24: 659–665.
- Oliveira FS, Pinfieldi CE, Parizoto NA, Liebano RE, Bossini PS, et al. (2009) Effect of low level laser therapy (830 nm) with different therapy regimes on the process of tissue repair in partial lesion calcaneus tendon. *Lasers in Surgery & Medicine* 41: 271–276.
- Fillipin LI, Mauriz JL, Vedovelli K, Moreira AJ, Zettler CG, et al. (2005) Low-level laser therapy (LLL) prevents oxidative stress and reduces fibrosis in rat traumatized Achilles tendon. *Lasers in Surgery & Medicine* 37: 293–300.
- Karu T (1999) Primary and secondary mechanisms of action of visible to near-IR radiation on cells. *Journal of Photochemistry & Photobiology B - Biology* 49: 1–17.
- Lane N (2006) Cell biology: power games. *Nature* 443: 901–903.
- Tafur J, Mills PJ (2008) Low-intensity light therapy: exploring the role of redox mechanisms. *Photomedicine and Laser Surgery* 26: 323–328.
- Lapchak PA, De Taboada L (2010) Transcranial near infrared laser treatment (NILT) increases cortical adenosine-5'-triphosphate (ATP) content following embolic strokes in rabbits. *Brain Research* 1306: 100–105.
- Karu T, Pyatibrat L, Kalendo G (1995) Irradiation with He-Ne laser increases ATP level in cells cultivated *in vitro*. *Journal of Photochemistry & Photobiology B - Biology* 27: 219–223.
- Kujawa J, Zavodnik L, Zavodnik I, Buko V, Lapshyna A, et al. (2004) Effect of low-intensity (3.75–25 J/cm<sup>2</sup>) near-infrared (810 nm) laser radiation on red blood cell ATPase activities and membrane structure. *Journal of Clinical Laser Medicine & Surgery* 22: 111–117.
- Wong-Riley MTT, Liang HL, Eells JT, Chance B, Henry MM, et al. (2005) Photobiomodulation directly benefits primary neurons functionally inactivated by toxins: role of cytochrome c oxidase. *Journal of Biological Chemistry* 280: 4761–4771.
- Zhang J, Xing D, Gao X (2008) Low-power laser irradiation activates Src tyrosine kinase through reactive oxygen species-mediated signaling pathway. *Journal of Cellular Physiology* 217: 518–528.
- Karu TI (2008) Mitochondrial signaling in mammalian cells activated by red and near-IR radiation. *Photochemistry & Photobiology* 84: 1091–1099.
- Lubart R, Lavi R, Friedmann H, Rochkind S (2006) Photochemistry and photobiology of light absorption by living cells. *Photomedicine and Laser Surgery* 24: 179–185.

## Author Contributions

Conceived and designed the experiments: WCT JHSP. Performed the experiments: MSL CCH WCT JHSP. Analyzed the data: CCH MSL YHC FCL WCT JHSP. Contributed reagents/materials/analysis tools: FCL YHC CCH. Wrote the paper: WCT JHSP.



20. Liang HL, Whelan HT, Eells JT, Wong-Riley MTT (2008) Near-infrared light via light-emitting diode treatment is therapeutic against rotenone- and 1-methyl-4-phenylpyridinium ion-induced neurotoxicity. *Neuroscience* 153: 963–974.
21. Lohr NL, Kesler A, Pratt P, Bienengraber M, Warltier DC, et al. (2009) Enhancement of nitric oxide release from nitrosyl hemoglobin and nitrosyl myoglobin by red/near infrared radiation: potential role in cardioprotection. *Journal of Molecular & Cellular Cardiology* 47: 256–263.
22. Zhang R, Mio Y, Pratt PF, Lohr N, Warltier DC, et al. (2009) Near infrared light protects cardiomyocytes from hypoxia and reoxygenation injury by a nitric oxide dependent mechanism. *Journal of Molecular & Cellular Cardiology* 46: 4–14.
23. Samoilova KA, Zhevago NA, Petrishchev NN, Zimin AA (2008) Role of nitric oxide in the visible light-induced rapid increase of human skin microcirculation at the local and systemic levels: II. healthy volunteers. *Photomedicine and Laser Surgery* 26: 443–449.
24. Kipshidze N, Keelan MH, Petersen JR, Bachutashvili I, Vossoughi J, et al. (2000) Photoactivation of vascular iNOS and elevation of cGMP in vivo: possible mechanism for photovaso-relaxation and inhibition of restenosis in an atherosclerotic rabbit models. *Photochemistry & Photobiology* 72: 579–582.
25. Chen C-H, Tsai J-L, Wang Y-H, Lee C-L, Chen J-K, et al. (2009) Low-level laser irradiation promotes cell proliferation and mRNA expression of type I collagen and decorin in porcine Achilles tendon fibroblasts in vitro. *Journal of Orthopaedic Research* 27: 646–650.
26. Tsai W-C, Chen JY-S, Pang J-HS, Hsu C-C, Lin M-S, et al. (2008) Therapeutic ultrasound stimulation of tendon cell migration. *Connective Tissue Research* 49: 367–373.
27. Chao P-HG, Lu HH, Hung CT, Nicoll SB, Bulinski JC (2007) Effects of applied DC electric field on ligament fibroblast migration and wound healing. *Connective Tissue Research* 48: 188–197.
28. Bershadsky AD, Futerman AH (1994) Disruption of the Golgi apparatus by brefeldin A blocks cell polarization and inhibits directed cell migration. *Proceedings of the National Academy of Sciences of the United States of America* 91: 5686–5689.
29. Xie Z, Tsai L-H (2004) Cdk5 phosphorylation of FAK regulates centrosome-associated microtubules and neuronal migration. *Cell Cycle* 3: 108–110.
30. Tamura M, Gu J, Matsumoto K, Aota S, Parsons R, et al. (1998) Inhibition of cell migration, spreading, and focal adhesions by tumor suppressor PTEN. *Science* 280: 1614–1617.
31. Kruchten AE, McNiven MA (2006) Dynamin as a mover and pincher during cell migration and invasion. *Journal of Cell Science* 119: 1683–1690.
32. Schafer DA, Weed SA, Binns D, Karginov AV, Parsons JT, et al. (2002) Dynamin2 and cortactin regulate actin assembly and filament organization. *Current Biology* 12: 1852–1857.
33. Dominik M, Klopocka W, Pomorski P, Kocik E, Redowicz MJ (2005) Characterization of Amoeba proteus myosin VI immunoanalogue. *Cell Motility & the Cytoskeleton* 61: 172–188.
34. Eppinga RD, Krueger EW, Weller SG, Zhang L, Cao H, et al. (2011) Increased expression of the large GTPase dynamin 2 potentiates metastatic migration and invasion of pancreatic ductal carcinoma. *Oncogene*.
35. O'Brien M (1992) Functional anatomy and physiology of tendons. *Clinics in Sports Medicine* 11: 505–520.
36. Leadbetter WB (1992) Cell-matrix response in tendon injury. *Clinics in Sports Medicine* 11: 533–578.
37. Crespi R, Romanos GE, Cassinelli C, Gherlone E (2006) Effects of Er:YAG laser and ultrasonic treatment on fibroblast attachment to root surfaces: an in vitro study. *Journal of Periodontology* 77: 1217–1222.
38. Rochkind S, El-Ani D, Nevo Z, Shahar A (2009) Increase of neuronal sprouting and migration using 780 nm laser phototherapy as procedure for cell therapy. *Lasers in Surgery & Medicine* 41: 277–281.
39. Anders JJ, Romanczyk TB, Ilev IK, Moges H, Longo L, et al. (2008) Light supports neurite outgrowth of human neural progenitor cells in vitro: the role of P2Y receptors. *IEEE Journal of Selected Topics in Quantum Electronics* 14: 118–125.
40. Buccione R, Orth JD, McNiven MA (2004) Foot and mouth: podosomes, invadopodia and circular dorsal ruffles. *Nature Reviews Molecular Cell Biology* 5: 647–657.
41. Ezratty EJ, Partridge MA, Gundersen GG (2005) Microtubule-induced focal adhesion disassembly is mediated by dynamin and focal adhesion kinase. *Nature Cell Biology* 7: 581–590.
42. Macia E, Ehrlich M, Massol R, Boucrot E, Brunner C, et al. (2006) Dynasore, a cell-permeable inhibitor of dynamin. *Developmental Cell* 10: 839–850.
43. Kirchhausen T, Macia E, Pelish HE (2008) Use of dynasore, the small molecule inhibitor of dynamin, in the regulation of endocytosis. *Methods in Enzymology* 438: 77–93.
44. Yamada H, Abe T, Li S-A, Masuoka Y, Isoda M, et al. (2009) Dynasore, a dynamin inhibitor, suppresses lamellipodia formation and cancer cell invasion by destabilizing actin filaments. *Biochemical & Biophysical Research Communications* 390: 1142–1148.
45. Bjordal JM, Couppe C, Ljunggren AE (2001) Low level laser therapy for tendinopathy: evidence of a dose response. *Physical Therapy Reviews* 6: 91–99.
46. Huang, Y-Y, Chen, A. C-H, Carroll JD, Hamblin MR (2009) Biphasic dose response in low level light therapy. *Dose Response* 7: 358–383.
